# Supplementary material for: Chemogenetic inactivation reveals the inhibitory control function of the prefronto-striatal pathway in the macaque brain
Source: PubMed Central journal article supplement (PMC8446038; doi:10.1038/s42003-021-02623-y), 2021-09-16
Supplement: 42003_2021_2623_MOESM3_ESM.pdf [file 42003_2021_2623_MOESM3_ESM.pdf]

## Description of Additional Supplementary Files

**File name:** Supplementary Data 1

**Description:** An excel file containing the data of main figures (Figures 1-8).

**File name:** Supplementary Data 2

**Description:** An excel file containing the data of supplementary information (Supplementary figures 1-12).
